# Supplementary material
Source: HighWire-hosted journal article supplement (https://ajnr-sso.highwirestaging.com/highwire/filestream/106670/field_highwire_adjunct_files/0/1058.pdf)
Supplement: 1058.pdf [file 1058.pdf]

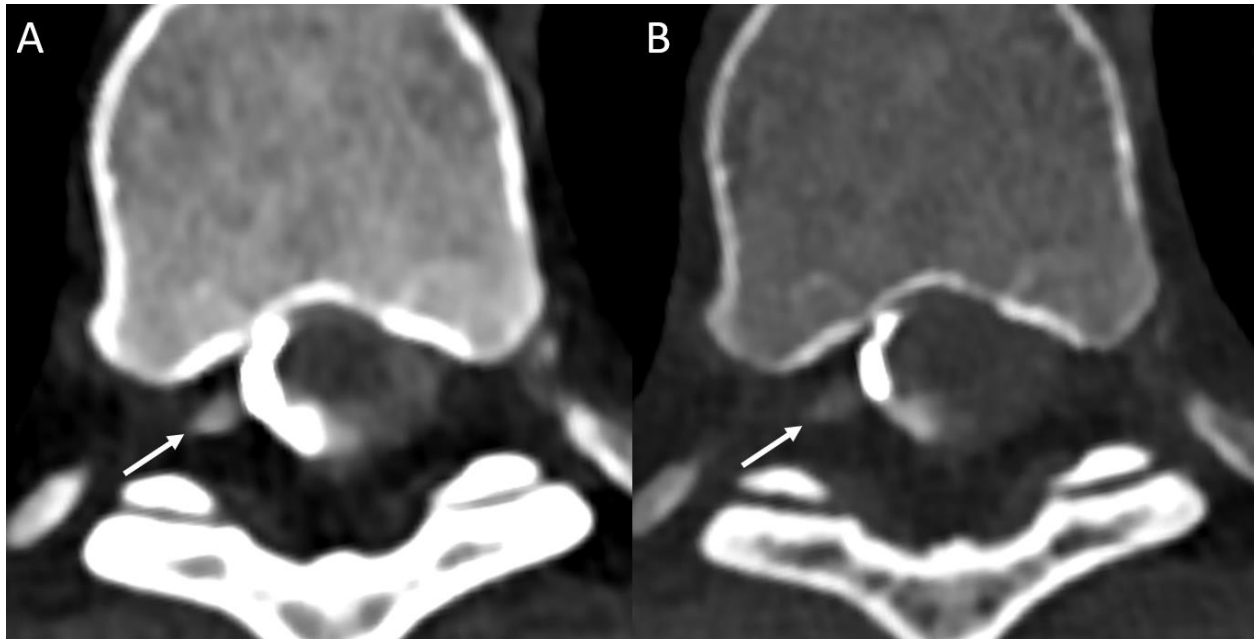

Supplemental Figure 3. Benefits of 40 keV VMIs in detecting subtle contrast leaks. Axial 40 keV (A) and T3D (B) images from a right lateral decubitus dynamic PC-CTM, both with identical window/level settings, demonstrate a right lateral dural leak at T8 (A-B, arrows). The finding is more conspicuous on the 40 keV VMI due to accentuation of iodine conspicuity.
